# Supplementary material for: Muscle synergy stability and human balance maintenance
Source: PubMed Central journal article supplement (PMC4161771; doi:10.1186/1743-0003-11-129), 2014-08-30

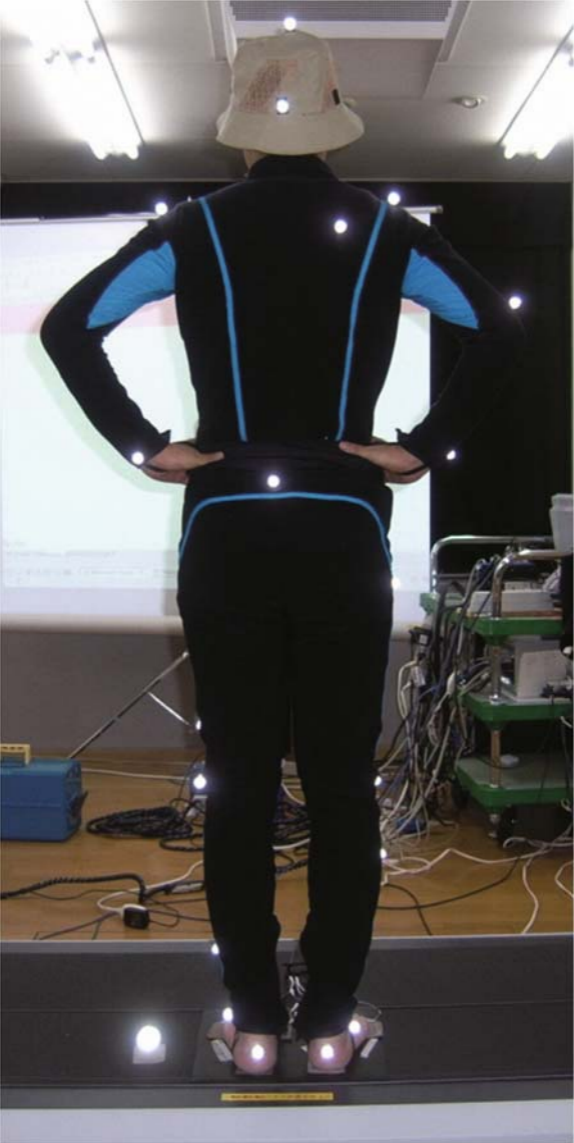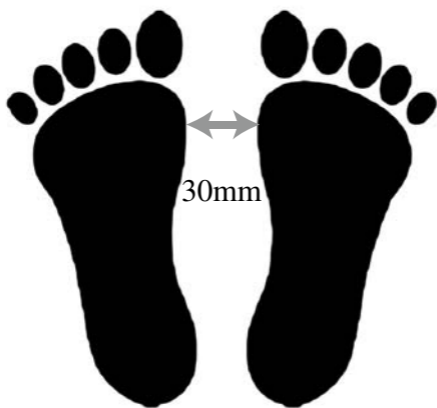

Supplement: 12984_2013_651_MOESM2_ESM.pdf [file 12984_2013_651_MOESM2_ESM.pdf]
