# Supplementary material for: Muscle synergy stability and human balance maintenance
Source: PubMed Central journal article supplement (PMC4161771; doi:10.1186/1743-0003-11-129), 2014-08-30

Platform Score (PS) - age,  $R=-0.688$ 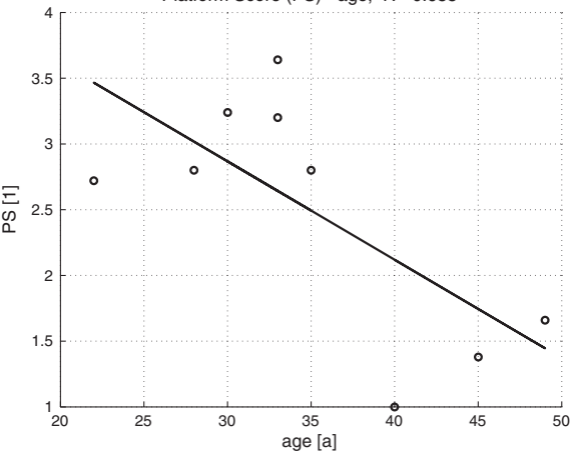Platform Score (PS) - height,  $R=0.228$ 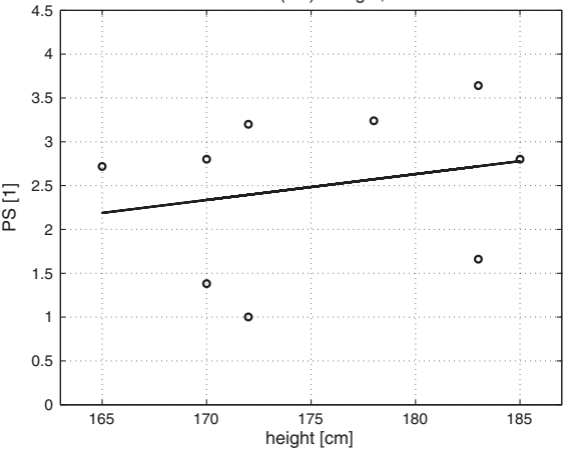Platform Score (PS) - weight,  $R=0.167$ 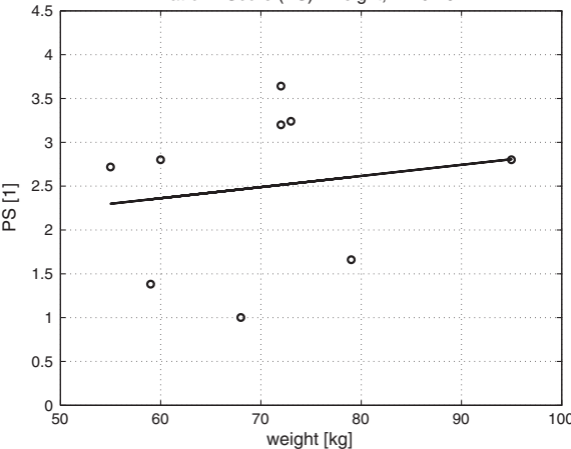

Supplement: 12984_2013_651_MOESM7_ESM.pdf [file 12984_2013_651_MOESM7_ESM.pdf]
